# Supplementary material
Source: Springer Nature journal article supplement (https://www.springermedizin.de/resource/supplementary/12890_2012_430_MOESM4_ESM.pdf/9505208)

Part A – Main effects of genetic variation and interaction with smoke exposure

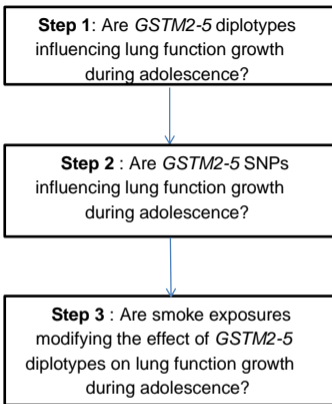

Part B – Main effects of epigenetic variation and interaction with genetic variation

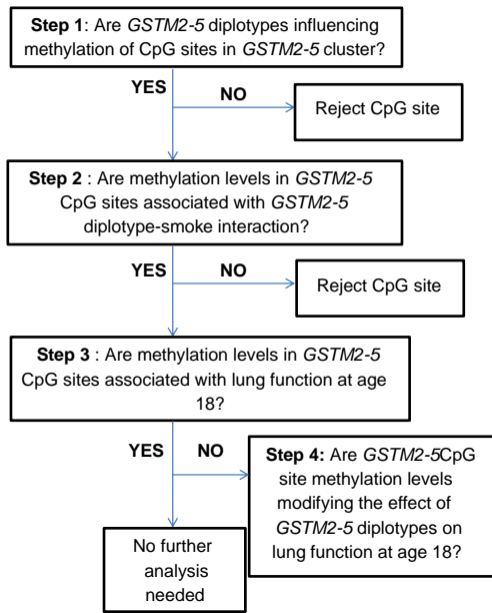

Supplement: MOESM4 [file 9505208]
